# Supplementary material for: U.S. Federal Agency Interests and Key Considerations for New Approach Methodologies for Nanomaterials
Source: PubMed Central journal article supplement (PMC9115850; doi:10.14573/altex.2105041), 2021-12-03
Supplement: NIHMS1792464-supplement-BD5FA2B27A44129C49353F68BEC5AEB6.pdf [file NIHMS1792464-supplement-BD5FA2B27A44129C49353F68BEC5AEB6.pdf]

# U.S. Federal Agency Interests and Key Considerations for New Approach Methodologies for Nanomaterials

## Supplementary Data

Tab. S1: Selected ASTM, ISO, and OECD nanomaterials guidances<sup>a</sup>

| Agency or documentary standards organizations | Status                  | Document number  | Title                                                                                                                                                                   | Reference                           |
|-----------------------------------------------|-------------------------|------------------|-------------------------------------------------------------------------------------------------------------------------------------------------------------------------|-------------------------------------|
| ASTM                                          | Draft under development | WK60553          | New Guide for Evaluation of Nanoparticulate Material Internalization by Phagocytic Cells <i>In Vitro</i>                                                                | ASTM WK60553, 2017                  |
|                                               |                         | WK60554          | New Test Method for Detection of Nitric Oxide Production                                                                                                                | ASTM WK60554, 2017                  |
|                                               | In balloting            | WK63310          | New Guide for Visualization and Identification of Nanomaterials in Biological and Nonbiological Matrices Using Darkfield Microscopy with Hyperspectral Imaging Analysis | ASTM WK63310, 2018                  |
|                                               | Published/active        | ASTM E2524-08    | Standard Test Method for Analysis of Hemolytic Properties of Nanoparticles                                                                                              | ASTM E2524-08, 2013                 |
|                                               |                         | ASTM E2525-08    | Standard Test Method for Evaluation of the Effect of Nanoparticulate Materials on the Formation of Mouse Granulocyte-Macrophage Colonies                                | ASTM E2525-08, 2013                 |
|                                               |                         | ASTM E2526-08    | Standard Test Method for Evaluation of Cytotoxicity of Nanoparticulate Materials in Porcine Kidney Cells and Human Hepatocarcinoma Cells                                | ASTM E2525-08, 2013                 |
|                                               |                         | ASTM E3238-20    | Standard Test Method for Quantitative Measurement of the Chemoattractant Capacity of a Nanoparticulate Material <i>In Vitro</i>                                         | ASTM E3238-20, 2020                 |
| ISO                                           | Under development       | ISO/CD TS 19337  | Nanotechnologies – Characteristics of Working Suspensions of Nano-Objects for <i>In Vitro</i> Assays to Evaluate Inherent Nano-Object Toxicity                          | ISO/CD TS 19337, not yet available  |
|                                               |                         | ISO/DTR 22455    | Nanotechnologies – High Throughput Screening Method for Nanoparticles Toxicity using 3D Cells                                                                           | ISO/DTR 22455, not yet available    |
|                                               |                         | ISO/DTR 23463    | Nanotechnologies – Characterization of Carbon Nanotube and Carbon Nanofiber Aerosols in Relation to Inhalation Toxicity Tests                                           | ISO/DTR 23463, not yet available    |
|                                               |                         | ISO/DTS 21357    | Nanotechnologies – Evaluation of the Mean Size of Nano-Objects in Liquid Dispersions by Static Multiple Light Scattering (SMLS)                                         | ISO/DTS 21357, not yet available    |
|                                               |                         | ISO/DTS 23302    | Nanotechnologies – Guidance on Measurands for Characterising Nano-Objects and Materials that Contain Them                                                               | ISO/DTS 23302, not yet available    |
|                                               |                         | ISO/PRF TS 21633 | Nanotechnologies – Label-Free Impedance Technology to Assess the Toxicity of Nanomaterials <i>In Vitro</i>                                                              | ISO/PRF TS 21633, not yet available |
|                                               |                         | ISO/PRF TS 23034 | Nanotechnologies – Method to Estimate Cellular Uptake of Carbon Nanomaterials using Optical Absorption                                                                  | ISO/PRF TS 23034, not yet available |
|                                               |                         | ISO/WD TR 24672  | Nanotechnologies – Guidance on the Measurement of Nanoparticle Number Concentration                                                                                     | ISO/WD TR 24672, not yet available  |
|                                               |                         | ISO/WD TR 5387   | Nanotechnologies – Lung Burden Measurement of Nanomaterials for Inhalation Toxicity Studies                                                                             | ISO/WD TR 5387, not yet available   |

| Agency or documentary standards organizations | Status                                                                                                                            | Document number     | Title                                                                                                                                                                                                                                  | Reference                         |
|-----------------------------------------------|-----------------------------------------------------------------------------------------------------------------------------------|---------------------|----------------------------------------------------------------------------------------------------------------------------------------------------------------------------------------------------------------------------------------|-----------------------------------|
| ISO                                           | Under development                                                                                                                 | ISO/WD TS 5094      | Nanotechnologies – Assessment of Peroxidase-Like Activity of Metal and Metal Oxide Nanoparticles                                                                                                                                       | ISO/WD TS 5094, not yet available |
| ISO                                           | Published/active                                                                                                                  | ISO 10801:2010      | Nanotechnologies – Generation of Metal Nanoparticles for Inhalation Toxicity Testing using the Evaporation/Condensation Method                                                                                                         | ISO, 2010a                        |
|                                               |                                                                                                                                   | ISO 10808:2010      | Nanotechnologies – Characterization of Nanoparticles in Inhalation Exposure Chambers for Inhalation Toxicity Testing                                                                                                                   | ISO, 2010b                        |
|                                               |                                                                                                                                   | ISO 19007:2018      | Nanotechnologies – <i>In Vitro</i> MTS Assay for Measuring the Cytotoxic Effect of Nanoparticles                                                                                                                                       | ISO, 2018a                        |
|                                               |                                                                                                                                   | ISO 20814:2019      | Nanotechnologies – Testing the Photocatalytic Activity of Nanoparticles for NADH Oxidation                                                                                                                                             | ISO, 2019a                        |
|                                               |                                                                                                                                   | ISO/29701:2010      | Nanotechnologies – Endotoxin Test on Nanomaterial Samples for <i>In Vitro</i> Systems – <i>Limulus</i> Amebocyte Lysate (LAL) Test                                                                                                     | ISO, 2010c                        |
|                                               |                                                                                                                                   | ISO/TR 13014:2012   | Nanotechnologies – Guidance on Physicochemical Characterization of Engineered Nanoscale Materials for Toxicologic Assessment                                                                                                           | ISO, 2012a                        |
|                                               |                                                                                                                                   | ISO/TR 13121:2011   | Nanotechnologies – Nanomaterial Risk Evaluation                                                                                                                                                                                        | ISO, 2011                         |
| ISO                                           | Published/active                                                                                                                  | ISO/TR 16196:2016   | Nanotechnologies – Compilation and Description of Sample Preparation and Dosing Methods for Engineered and Manufactured Nanomaterials                                                                                                  | ISO, 2016a                        |
|                                               |                                                                                                                                   | ISO/TR 16197:2014   | Nanotechnologies – Compilation and Description of Toxicological Screening Methods for Manufactured Nanomaterials                                                                                                                       | ISO, 2014a                        |
|                                               |                                                                                                                                   | ISO/TR 18637:2016   | Nanotechnologies – Overview of Available Frameworks for the Development of Occupational Exposure Limits and Bands for Nano-Objects and their Aggregates and Agglomerates (NOAAs)                                                       | ISO, 2016b                        |
|                                               |                                                                                                                                   | ISO/TR 19057:2017   | Nanotechnologies – Use and Application of Acellular <i>In Vitro</i> Tests and Methodologies to Assess Nanomaterial Biodurability                                                                                                       | ISO, 2017a                        |
|                                               |                                                                                                                                   | ISO/TR 19601:2017   | Nanotechnologies – Aerosol Generation for Air Exposure Studies of Nano-Objects and their Aggregates and Agglomerates                                                                                                                   | ISO, 2017b                        |
|                                               |                                                                                                                                   | ISO/TR 21624:2020   | Nanotechnologies – Considerations for <i>In Vitro</i> Studies of Airborne Nano-Objects and their Aggregates and Agglomerates (NOAA)                                                                                                    | ISO, 2020a                        |
|                                               |                                                                                                                                   | ISO/TR 22019:2019   | Nanotechnologies – Considerations for Performing Toxicokinetic Studies with Nanomaterials                                                                                                                                              | ISO, 2019b                        |
|                                               |                                                                                                                                   | ISO/TS 12901-1:2012 | Nanotechnologies – Occupational Risk Management Applied to Engineered Nanomaterials Part 1: Principles and Approaches                                                                                                                  | ISO, 2012b                        |
| ISO/TS 12901-2:2014                           | Nanotechnologies – Occupational Risk Management Applied to Engineered Nanomaterials – Part 2: Use of the Control Banding Approach | ISO, 2014b          |                                                                                                                                                                                                                                        |                                   |
| ISO                                           | Published/active                                                                                                                  | ISO/TS 16195:2013   | Nanotechnologies – Generic Requirements for Reference Materials for Development of Methods for Characteristic Testing, Performance Testing and Safety Testing of Nano-Particle and Nano-Fiber Powders [Replaces ISO/TS 16195 (2013)]   | ISO, 2018b                        |
|                                               |                                                                                                                                   | ISO/TS 16550:2014   | Nanotechnologies – Determination of Silver Nanoparticles Potency by Release of Muramic Acid from <i>Staphylococcus aureus</i>                                                                                                          | ISO, 2014c                        |
|                                               |                                                                                                                                   | ISO/TS 18827:2017   | Nanotechnologies – Electron Spin Resonance (ESR) as a Method for Measuring Reactive Oxygen Species (ROS) Generated by Metal Oxide Nanomaterials                                                                                        | ISO, 2017c                        |
|                                               |                                                                                                                                   | ISO/TS 19006:2016   | Nanotechnologies – 5-(and 6)-Chloromethyl-2',7' dichloro-dihydrofluorescein diacetate (CM-H2DCF-DA) Assay for Evaluating Nanoparticle-Induced Intracellular Reactive Oxygen Species (ROS) Production in RAW 264.7 Macrophage Cell Line | ISO, 2016c                        |

| Agency or documentary standards organizations | Status           | Document number          | Title                                                                                                                                                                                            | Reference   |
|-----------------------------------------------|------------------|--------------------------|--------------------------------------------------------------------------------------------------------------------------------------------------------------------------------------------------|-------------|
|                                               |                  | ISO/TS 19337:2016        | Nanotechnologies – Characteristics of Working Suspensions of Nano-Objects for <i>In Vitro</i> Assays to Evaluate Inherent Nano-Object Toxicity                                                   | ISO, 2016d  |
|                                               |                  | ISO/TS 20660:2019        | Nanotechnologies – Antibacterial Silver Nanoparticles – Specification of Characteristics and Measurement Methods                                                                                 | ISO, 2019c  |
|                                               |                  | ISO/TS 20787:2017        | Nanotechnologies – Aquatic Toxicity Assessment of Nanomaterials in Saltwater Lakes using <i>Artemia sp.</i> Nauplii                                                                              | ISO, 2017d  |
|                                               |                  | ISO/TS 21236-1:2019      | Nanotechnologies – Clay Nanomaterials – Part 1: Specification of Characteristics and Measurement Methods for Layered Clay Nanomaterials                                                          | ISO, 2019d  |
|                                               |                  | ISO/TS 22082:2020        | Nanotechnologies – Assessment of Nanomaterial Toxicity using Dechorionated Zebrafish Embryo                                                                                                      | ISO, 2020b  |
|                                               |                  | ISO/TS 23459:2021        | Nanotechnologies – Assessment of Protein Secondary Structure during an Interaction with Nanomaterials using Ultraviolet Circular Dichroism                                                       | ISO, 2021   |
| OECD                                          | Published/active | GD 39                    | Guidance Document on Inhalation Toxicity Studies                                                                                                                                                 | OECD, 2009a |
|                                               |                  | GD 317                   | Guidance Document on Aquatic and Sediment Toxicological Testing of Nanomaterials                                                                                                                 | OECD, 2020a |
|                                               |                  | TG 318                   | Guidance Document for the Testing of Dissolution and Dispersion Stability of Nanomaterials and the Use of the Data for Further Environmental Testing and Assessment Strategies                   | OECD, 2017b |
|                                               |                  | TG 412                   | Subacute Inhalation Toxicity: 28-Day Study                                                                                                                                                       | OECD, 2018c |
|                                               |                  | TG 413                   | Subchronic Inhalation Toxicity: 90-Day Study                                                                                                                                                     | OECD, 2018d |
|                                               |                  | TG 433                   | Acute Inhalation Toxicity - Fixed Concentration Procedure                                                                                                                                        | OECD, 2018e |
| OECD                                          | Published/active | ENV/JM/MONO (2009)21     | Preliminary Review of OECD Test Guidelines for their Applicability to Manufactured Nanomaterials                                                                                                 | OECD, 2009b |
|                                               |                  | ENV/JM/MONO (2009)20/REV | Guidance Manual for the Testing of Manufactured Nanomaterials: OECD's Sponsorship Programme: First Revision                                                                                      | OECD, 2010a |
|                                               |                  | ENV/JM/MONO (2010)46     | List of Manufactured Nanomaterials and List of Endpoints for Phase One of the Sponsorship Programme for the Testing of Manufactured Nanomaterials: Revision                                      | OECD, 2010b |
|                                               |                  | ENV/JM/MONO (2012)40     | Guidance on Sample Preparation and Dosimetry for the Safety Testing of Nanomaterials                                                                                                             | OECD, 2012  |
|                                               |                  | ENV/JM/MONO (2016)63     | Alternative Testing Strategies in Risk Assessment of Manufactured Nanomaterials: Current State of Knowledge and Research Needs to Advance Their Use.                                             | OECD, 2017a |
|                                               |                  | ENV/JM/MONO (2018)4      | Evaluation of <i>In Vitro</i> Methods for Human Hazard Assessment Applied in the OECD Testing Programme for the Safety of Manufactured Nanomaterials                                             | OECD, 2018a |
|                                               |                  | ENV/JM/MONO (2018)24     | Investigating the Different Types of Risk Assessments of Manufactured Nanomaterials. Identifying Tools Available for Risk Management Measures and Uncertainties Driving Nano-Specific Data Needs | OECD, 2018b |
|                                               |                  | ENV/JM/MONO (2019)12     | Physical-chemical Decision Framework to Inform Decisions for Risk Assessment of Manufactured Nanomaterials                                                                                       | OECD, 2019a |
|                                               |                  | ENV/JM/MONO (2019)13     | Guiding Principles for Measurements and Reporting for Nanomaterials: Physical Chemical Properties                                                                                                | OECD, 2019b |
|                                               |                  | ENV/JM/MONO (2020)32     | Ability of Biopersistent/Biodurable Manufactured Nanomaterials (MNs) to Induce Lysosomal Membrane Permeabilization (LMP) as a Prediction of Their Long-Term Toxic Effects                        | OECD, 2020b |

| Agency or documentary standards organizations | Status | Document number      | Title                                                                                                                                                                                                                                            | Reference   |
|-----------------------------------------------|--------|----------------------|--------------------------------------------------------------------------------------------------------------------------------------------------------------------------------------------------------------------------------------------------|-------------|
|                                               |        | ENV/JM/MONO (2020)33 | Advancing Adverse Outcome Pathway (AOP) Development for Nanomaterial Risk Assessment and Categorisation Part 1: Final Project Report and Recommendations with Methodology to Prioritise Key Events (KEs) Relevant for Manufactured Nanomaterials | OECD, 2020c |
|                                               |        | ENV/JM/MONO (2020)34 | Advancing Adverse Outcome Pathway (AOP) Development for Nanomaterial Risk Assessment and Categorisation Part 2: Case Study on Tissue Injury                                                                                                      | OECD, 2020d |
|                                               |        | ENV/JM/MONO (2020)35 | Advancing Adverse Outcome Pathway (AOP) Development for Nanomaterial Risk Assessment and Categorisation Part 3: Workshop Report and Recommendations                                                                                              | OECD, 2020e |

<sup>a</sup>This table is not intended to be a complete compendium of ASTM, ISO, or OECD documents related to nanomaterials.

Additional relevant documents may be found at:

- <https://www.astm.org/Standards/nanotechnology-standards.html>
- <https://www.iso.org/standards.html>
- <https://www.oecd.org/env/ehs/testing/oecdguidelinesforthetestingofchemicals.htm>
- <http://www.oecd.org/env/ehs/nanosafety/publications-series-safety-manufactured-nanomaterials.htm>

## References

- ASTM E2524-08 (2013). Standard Test Method for Analysis of Hemolytic Properties of Nanoparticles. West Conshohocken, PA: ASTM International. doi:10.1520/E2524-08R13
- ASTM E2525-08 (2013). Test Method for Evaluation of the Effect of Nanoparticulate Materials on the Formation of Mouse Granulocyte-Macrophage Colonies. ASTM International. doi:10.1520/E2525-08R13
- ASTM E3238-20 (2020). Standard Test Method for Quantitative Measurement of the Chemoattractant Capacity of a Nanoparticulate Material In Vitro. West Conshohocken, PA: ASTM International. doi:10.1520/E3238-20
- ASTM WK60553 (2017). New Guide for Evaluation of Nanoparticulate Material Internalization by Phagocytic Cells In Vitro. West Conshohocken, PA: ASTM International. <https://www.astm.org/DATABASE.CART/WORKITEMS/WK60553.htm> (accessed 21.10.2020).
- ASTM WK60554 (2017). New Test Method for Detection of Nitric Oxide Production. West Conshohocken, PA: ASTM International. <https://www.astm.org/DATABASE.CART/WORKITEMS/WK60554.htm> (accessed 21.10.2020).
- ASTM WK63310 (2018). New Guide for Visualization and Identification of Nanomaterials in Biological and Nonbiological Matrices Using Darkfield Microscopy with Hyperspectral Imaging Analysis. West Conshohocken, PA: ASTM International. <https://www.astm.org/DATABASE.CART/WORKITEMS/WK63310.htm> (accessed 21.10.2020).
- ISO (2010a). ISO 10801:2010 Nanotechnologies – Generation of Metal Nanoparticles for Inhalation Toxicity Testing using the Evaporation/Condensation Method. <https://www.iso.org/cms/render/live/en/sites/isoorg/contents/data/standard/04/61/46129.html> (accessed 21.10.2020).
- ISO (2010b). ISO 10808:2020 Nanotechnologies – Characterization of Nanoparticles in Inhalation Exposure Chambers for Inhalation Toxicity Testing. <https://www.iso.org/cms/render/live/en/sites/isoorg/contents/data/standard/04/61/46130.html> (accessed 21.10.2020).
- ISO (2010c). ISO 29701:2010 Nanotechnologies – Endotoxin Test on Nanomaterial Samples for In Vitro Systems – Limulus amebocyte Lysate (LAL) Test. <https://www.iso.org/cms/render/live/en/sites/isoorg/contents/data/standard/04/56/45640.html> (accessed 22.10.2020).
- ISO (2011). ISO/TR 13121:2011 Nanotechnologies – Nanomaterial Risk Evaluation. <https://www.iso.org/cms/render/live/en/sites/isoorg/contents/data/standard/05/29/52976.html> (accessed 22.10.2020).
- ISO (2012a). ISO/TR 13014:2012 Nanotechnologies – Guidance on Physicochemical Characterization of Engineered Nanoscale Materials for Toxicologic Assessment. <https://www.iso.org/cms/render/live/en/sites/isoorg/contents/data/standard/05/23/52334.html> (accessed 22.10.2020).
- ISO (2012b). ISO/TS 12901-1:2012 Nanotechnologies – Occupational Risk Management Applied to Engineered Nanomaterials Part 1: Principles and Approaches.

- <https://www.iso.org/cms/render/live/en/sites/isoorg/contents/data/standard/05/21/52125.html> (accessed 22.10.2020).
- ISO (2013). ISO/TS 16195:2013 – Nanotechnologies – Generic Requirements for Reference Materials for Development of Methods for Characteristic Testing, Performance Testing and Safety Testing of Nano-Particle and Nano-Fiber Powders. <https://webstore.ansi.org/Standards/ISO/ISOTS161952013> (accessed 22.10.2020).
- ISO (2014a). ISO/TR 16197:2014 Nanotechnologies – Compilation and Description of Toxicological Screening Methods for Manufactured Nanomaterials. <https://www.iso.org/cms/render/live/en/sites/isoorg/contents/data/standard/05/58/55827.html> (accessed 22.10.2020).
- ISO (2014b). ISO/TR 12901-2:2014 Nanotechnologies – Occupational Risk Management Applied to Engineered Nanomaterials – Part 2: Use of the Control Banding Approach. <https://www.iso.org/cms/render/live/en/sites/isoorg/contents/data/standard/05/33/53375.html> (accessed 22.10.2020).
- ISO (2014c). ISO/TS 16550:2014 Nanotechnologies – Determination of Silver Nanoparticles Potency by Release of Muramic Acid from *Staphylococcus aureus*. <https://www.iso.org/cms/render/live/en/sites/isoorg/contents/data/standard/05/70/57084.html> (accessed 22.10.2020).
- ISO (2016a). ISO/TR 16196:2016 Nanotechnologies – Compilation and Description of Sample Preparation and Dosing Methods for Engineered and Manufactured Nanomaterials. <https://www.iso.org/cms/render/live/en/sites/isoorg/contents/data/standard/05/58/55826.html> (accessed 22.10.2020).
- ISO (2016b). ISO/TR 18637:2016 Nanotechnologies – Overview of Available Frameworks for the Development of Occupational Exposure Limits and Bands for Nano-Objects and their Aggregates and Agglomerates (NOAAs). <https://www.iso.org/cms/render/live/en/sites/isoorg/contents/data/standard/06/30/63096.html> (accessed 22.10.2020).
- ISO (2016c). ISO/TS 19006:2016 Nanotechnologies – 5-(and 6)-Chloromethyl-2',7' dichloro-dihydrofluorescein diacetate (CM-H2DCF-DA) Assay for Evaluating Nanoparticle-Induced Intracellular Reactive Oxygen Species (ROS) Production in RAW 264.7 Macrophage Cell Line. <https://www.iso.org/cms/render/live/en/sites/isoorg/contents/data/standard/06/36/63697.html> (accessed 22.10.2020).
- ISO (2016d). ISO/TS 19337:2016 Nanotechnologies – Characteristics of Working Suspensions of Nano-Objects for *In Vitro* Assays to Evaluate Inherent Nano-Object Toxicity. <https://www.iso.org/cms/render/live/en/sites/isoorg/contents/data/standard/06/46/64652.html> (accessed 22.10.2020).
- ISO (2017a). ISO/TR 19057:2017 Nanotechnologies – Use and Application of Acellular *In Vitro* Tests and Methodologies to Assess Nanomaterial Biodurability. <https://www.iso.org/cms/render/live/en/sites/isoorg/contents/data/standard/06/38/63836.html> (accessed 22.10.2020).
- ISO (2017b). ISO/TR 19601:2017 Nanotechnologies – Aerosol generation for air exposure studies of nano-objects and their aggregates and agglomerates (NOAA). <https://www.iso.org/cms/render/live/en/sites/isoorg/contents/data/standard/06/54/65451.html> (accessed 22.10.2020).
- ISO (2017c). ISO/TS 18827:2017 Electron Spin Resonance (ESR) as a Method for Measuring Reactive Oxygen Species (ROS) Generated by Metal Oxide Nanomaterials. <https://www.iso.org/cms/render/live/en/sites/isoorg/contents/data/standard/06/35/63502.html> (accessed 22.10.2020).
- ISO (2017d). ISO/TS 20787:2017 Nanotechnologies – Aquatic Toxicity Assessment of Nanomaterials in Saltwater Lakes using *Artemia* sp. Nauplii. <https://www.iso.org/cms/render/live/en/sites/isoorg/contents/data/standard/06/90/69087.html> (accessed 22.10.2020).
- ISO (2018a). ISO 19007:2018 Nanotechnologies – *In Vitro* MTS Assay for Measuring the Cytotoxic Effect of Nanoparticles. <https://www.iso.org/cms/render/live/en/sites/isoorg/contents/data/standard/06/36/63698.html> (accessed 22.10.2020).
- ISO (2018b). ISO/TS 16195:2018 Nanotechnologies – Specification for developing representative test materials consisting of nano-objects in dry powder form. <https://www.iso.org/cms/render/live/en/sites/isoorg/contents/data/standard/07/31/73130.html> (accessed 22.10.2020).
- ISO (2019a). ISO 20814:2019 Nanotechnologies – Testing the Photocatalytic Activity of Nanoparticles for NADH Oxidation. <https://www.iso.org/standard/69298.html>
- ISO (2019b). ISO/TR 22019:2019 Nanotechnologies – Considerations for Performing Toxicokinetic Studies with Nanomaterials. <https://www.iso.org/cms/render/live/en/sites/isoorg/contents/data/standard/07/23/72381.html> (accessed 22.10.2020).

- ISO (2019c). ISO/TS 20660:2019 Nanotechnologies – Antibacterial Silver Nanoparticles – Specification of Characteristics and Measurement Methods.  
<https://www.iso.org/cms/render/live/en/sites/isoorg/contents/data/standard/06/87/68771.html> (accessed 22.10.2020).
- ISO (2019d). ISO/TS 21236-1:2019 Nanotechnologies – Clay Nanomaterials – Part 1: Specification of Characteristics and Measurement Methods for Layered Clay Nanomaterials.  
<https://www.iso.org/standard/70216.html?browse=tc>
- ISO (2020a). ISO/TR 21624:2020 Nanotechnologies – Considerations for In Vitro Studies of Airborne Nano-Objects and their Aggregates and Agglomerates (NOAA).  
<https://www.iso.org/cms/render/live/en/sites/isoorg/contents/data/standard/07/12/71273.html> (accessed June 4, 2020).
- ISO (2020b). ISO/TS 22082:2020 Nanotechnologies – Assessment of Nanomaterial Toxicity using Dechorionated Zebrafish Embryo.  
<https://www.iso.org/cms/render/live/en/sites/isoorg/contents/data/standard/07/25/72516.html> (accessed 22.10.2020).
- ISO (2021). ISO/TS 23459:2021 Nanotechnologies – Assessment of Protein Secondary Structure during an Interaction with Nanomaterials using Ultraviolet Circular Dichroism.  
<https://www.iso.org/cms/render/live/en/sites/isoorg/contents/data/standard/07/56/75638.html> (accessed 22.10.2020).
- ISO/CD TS 19337 (not yet available). ISO/CD TS 19337 Nanotechnologies – Characteristics of Working Suspensions of Nano-Objects for In Vitro Assays to Evaluate Inherent Nano-Object Toxicity.  
<https://www.iso.org/cms/render/live/en/sites/isoorg/contents/data/standard/08/05/80583.html> (accessed April 15, 2021a).
- ISO/DTR 22455 (not yet available). ISO/DTR 22455 Nanotechnologies – High Throughput Screening Method for Nanoparticles Toxicity using 3D Cells.  
<https://www.iso.org/cms/render/live/en/sites/isoorg/contents/data/standard/07/32/73244.html> (accessed October 22, 2020b).
- ISO/DTR 23463 (not yet available). ISO/DTR 23463 Nanotechnologies – Characterization of Carbon Nanotube and Carbon Nanofiber Aerosols in Relation to Inhalation Toxicity Tests.  
<https://www.iso.org/cms/render/live/en/sites/isoorg/contents/data/standard/07/56/75639.html> (accessed October 22, 2020c).
- ISO/DTS 21357 (not yet available). ISO/DTS 21357 Nanotechnologies – Evaluation of the Mean Size of Nano-Objects in Liquid Dispersions by Static Multiple Light Scattering (SMLS).  
<https://www.iso.org/cms/render/live/en/sites/isoorg/contents/data/standard/07/07/70759.html> (accessed April 15, 2021d).
- ISO/DTS 23302 (not yet available). ISO/DTS 23302 Nanotechnologies – Guidance on Measurands for Characterising Nano-Objects and Materials that Contain Them.  
<https://www.iso.org/cms/render/live/en/sites/isoorg/contents/data/standard/07/51/75190.html> (accessed April 15, 2021e).
- ISO/PRF TS 21633 (not yet available). ISO/PRF TS 21633 Nanomaterials – Label-Free Impedance Technology to Assess the Toxicity of Nanomaterials In Vitro.  
<https://www.iso.org/cms/render/live/en/sites/isoorg/contents/data/standard/07/12/71295.html> (accessed October 22, 2020f).
- ISO/PRF TS 23034 (not yet available). ISO/PRF TS 23034 Nanotechnologies – Method to Estimate Cellular Uptake of Carbon Nanomaterials using Optical Absorption.  
<https://www.iso.org/cms/render/live/en/sites/isoorg/contents/data/standard/07/43/74368.html> (accessed October 22, 2020g).
- ISO/WD TR 5387 (not yet available). ISO/WD TR 5387 Nanotechnologies – Lung Burden Measurement of Nanomaterials for Inhalation Toxicity Studies.  
<https://www.iso.org/cms/render/live/en/sites/isoorg/contents/data/standard/08/12/81226.html> (accessed April 15, 2021h).
- ISO/WD TR 24672 (not yet available). ISO/WD TR 24672 Nanotechnologies – Guidance on the Measurement of Nanoparticle Number Concentration.  
<https://www.iso.org/cms/render/live/en/sites/isoorg/contents/data/standard/07/93/79369.html> (accessed April 15, 2021i).
- ISO/WD TS 5094 (not yet available). ISO/WD TS 5094 Nanotechnologies – Assessment of Peroxidase-Like Activity of Metal and Metal Oxide Nanoparticles.  
<https://www.iso.org/cms/render/live/en/sites/isoorg/contents/data/standard/08/07/80771.html> (accessed 15.04.2021j).
- OECD (2009a). Guidance Document on Inhalation Toxicity Studies. *OECD Series on Testing and Assessment No. 39*. OECD Publishing, Paris.  
[https://www.oecd.org/officialdocuments/publicdisplaydocumentpdf/?cote=env/jm/mono\(2009\)28/rev1&doclang=en](https://www.oecd.org/officialdocuments/publicdisplaydocumentpdf/?cote=env/jm/mono(2009)28/rev1&doclang=en) (accessed 23.10.2020).

- OECD (2009b). Preliminary Review of OECD Test Guidelines for their Applicability to Manufactured Nanomaterials. [http://www.oecd.org/officialdocuments/publicdisplaydocumentpdf/?doclanguage=en&cote=env/jm/mono\(2009\)21](http://www.oecd.org/officialdocuments/publicdisplaydocumentpdf/?doclanguage=en&cote=env/jm/mono(2009)21) (accessed 27.08.2020).
- OECD (2010a). Guidance Manual for the Testing of Manufactured Nanomaterials: OECD's Sponsorship Programme: First Revision. *OECD Series on the Safety of Manufactured Nanomaterials No. 25*. OECD Publishing, Paris. [http://www.oecd.org/officialdocuments/publicdisplaydocumentpdf/?cote=env/jm/mono\(2009\)20/rev&doclanguage=en](http://www.oecd.org/officialdocuments/publicdisplaydocumentpdf/?cote=env/jm/mono(2009)20/rev&doclanguage=en)
- OECD (2010b). List of Manufactured Nanomaterials and List of Endpoints for Phase One of the Sponsorship Programme for the Testing of Manufactured Nanomaterials: Revision. *OECD Series on the Safety of Manufactured Nanomaterials No. 27*. OECD Publishing, Paris. [http://www.oecd.org/officialdocuments/publicdisplaydocumentpdf/?cote=env/jm/mono\(2010\)46&doclanguage=en](http://www.oecd.org/officialdocuments/publicdisplaydocumentpdf/?cote=env/jm/mono(2010)46&doclanguage=en)
- OECD (2012). Guidance on Sample Preparation and Dosimetry for the Safety Testing of Nanomaterials. OECD Publishing, Paris. *OECD Series on the Safety of Manufactured Nanomaterials No. 36*. [http://www.oecd.org/officialdocuments/publicdisplaydocumentpdf/?cote=env/jm/mono\(2012\)40&doclanguage=en](http://www.oecd.org/officialdocuments/publicdisplaydocumentpdf/?cote=env/jm/mono(2012)40&doclanguage=en) [www.oecd.org/officialdocuments/publicdisplaydocumentpdf/?cote=env/jm/mono\(2009\)20/rev&doclanguage=en](http://www.oecd.org/officialdocuments/publicdisplaydocumentpdf/?cote=env/jm/mono(2009)20/rev&doclanguage=en)
- OECD (2017a). Alternative Testing Strategies in Risk Assessment of Manufactured Nanomaterials: Current State of Knowledge and Research Needs to Advance Their Use. *OECD Series on the Safety of Manufactured Nanomaterials No. 80*. OECD Publishing, Paris. [http://www.oecd.org/officialdocuments/publicdisplaydocumentpdf/?cote=ENV/JM/MONO\(2016\)63&doclanguage=en](http://www.oecd.org/officialdocuments/publicdisplaydocumentpdf/?cote=ENV/JM/MONO(2016)63&doclanguage=en)
- OECD (2017b). Test No. 318: Dispersion Stability of Nanomaterials in Simulated Environmental Media. OECD Publishing, Paris. [https://www.oecd-ilibrary.org/environment/test-no-318-dispersion-stability-of-nanomaterials-in-simulated-environmental-media\\_9789264284142-en](https://www.oecd-ilibrary.org/environment/test-no-318-dispersion-stability-of-nanomaterials-in-simulated-environmental-media_9789264284142-en) (accessed October 23, 2020).
- OECD (2018a). Evaluation of In Vitro Methods for Human Hazard Assessment Applied in the OCED Testing Programme for the Safety of Manufactured Nanomaterials. *OECD Series on the Safety of Manufactured Nanomaterials No. 85*. OECD Publishing, Paris. [http://www.oecd.org/officialdocuments/publicdisplaydocumentpdf/?cote=ENV/JM/MONO\(2018\)4&doclanguage=en](http://www.oecd.org/officialdocuments/publicdisplaydocumentpdf/?cote=ENV/JM/MONO(2018)4&doclanguage=en)
- OECD (2018b). Investigating the Different Types of Risk Assessments of Manufactured Nanomaterials. Identifying Tools Available for Risk Management Measures and Uncertainties Driving Nano-Specific Data Needs. *OECD Series on the Safety of Manufactured Nanomaterials No. 88*. OECD Publishing, Paris. [https://www.oecd.org/officialdocuments/publicdisplaydocumentpdf/?cote=env/jm/mono\(2018\)24&doclanguage=en](https://www.oecd.org/officialdocuments/publicdisplaydocumentpdf/?cote=env/jm/mono(2018)24&doclanguage=en)
- OECD (2018c). Test No. 412: Subacute Inhalation Toxicity: 28-Day Study. OECD Publishing, Paris. [https://read.oecd-ilibrary.org/environment/test-no-412-subacute-inhalation-toxicity-28-day-study\\_9789264070783-en](https://read.oecd-ilibrary.org/environment/test-no-412-subacute-inhalation-toxicity-28-day-study_9789264070783-en) (accessed October 23, 2020).
- OECD (2018d). Test No. 413: Subchronic Inhalation Toxicity: 90-day Study. OECD Publishing, Paris. <https://www.oecd.org/env/test-no-413-subchronic-inhalation-toxicity-90-day-study-9789264070806-en.htm>
- OECD (2018e). Test No. 433: Acute Inhalation Toxicity: Fixed Concentration Procedure. OECD Publishing, Paris. [https://www.oecd-ilibrary.org/environment/test-no-433-acute-inhalation-toxicity-fixed-concentration-procedure\\_9789264284166-en](https://www.oecd-ilibrary.org/environment/test-no-433-acute-inhalation-toxicity-fixed-concentration-procedure_9789264284166-en) (accessed October 23, 2020).
- OECD (2019a). Physical-chemical Decision Framework to Inform Decisions for Risk Assessment of Manufactured Nanomaterials. *OECD Series on the Safety of Manufactured Nanomaterials No. 90*. OECD Publishing, Paris. [http://www.oecd.org/officialdocuments/publicdisplaydocumentpdf/?cote=env/jm/mono\(2019\)12&doclanguage=en](http://www.oecd.org/officialdocuments/publicdisplaydocumentpdf/?cote=env/jm/mono(2019)12&doclanguage=en)
- OECD (2019b). Guiding Principles for Measurements and Reporting for Nanomaterials: Physical Chemical Properties. *OECD Series on the Safety of Manufactured Nanomaterials No. 91*. OECD Publishing, Paris. [http://www.oecd.org/officialdocuments/publicdisplaydocumentpdf/?cote=env/jm/mono\(2019\)13&doclanguage=en](http://www.oecd.org/officialdocuments/publicdisplaydocumentpdf/?cote=env/jm/mono(2019)13&doclanguage=en)
- OECD (2020a). Guidance Document on Aquatic and Sediment Toxicity Testing of Nanomaterials. *OECD Series on Testing and Assessment No. 317*. OECD Publishing, Paris. [http://www.oecd.org/officialdocuments/publicdisplaydocumentpdf/?cote=env/jm/mono\(2020\)8&doclanguage=en](http://www.oecd.org/officialdocuments/publicdisplaydocumentpdf/?cote=env/jm/mono(2020)8&doclanguage=en) (accessed October 23, 2020).
- OECD (2020b). Ability of Biopersistent/Biodurable Manufactured Nanomaterials (MNs) to Induce Lysosomal Membrane Permeabilization (LMP) as a Prediction of Their Long-Term Toxic Effects. *OECD Series on the Safety of Manufactured Nanomaterials No. 92*. OECD Publishing, Paris. [http://www.oecd.org/officialdocuments/publicdisplaydocumentpdf/?cote=env/jm/mono\(2020\)32&doclanguage=en](http://www.oecd.org/officialdocuments/publicdisplaydocumentpdf/?cote=env/jm/mono(2020)32&doclanguage=en)
- OECD (2020c). Advancing Adverse Outcome Pathway (AOP) Development for Nanomaterial Risk Assessment and Categorisation Part 1: Final Project Report and Recommendations with Methodology to Prioritise Key Events (KEs) Relevant for Manufactured Nanomaterials. *OECD Series on the Safety of Manufactured Nanomaterials No. 93*. OECD Publishing, Paris.

- [http://www.oecd.org/officialdocuments/publicdisplaydocumentpdf/?cote=env/jm/%20mono\(2020\)33&doclanguage=en](http://www.oecd.org/officialdocuments/publicdisplaydocumentpdf/?cote=env/jm/%20mono(2020)33&doclanguage=en)
- OECD (2020d). Advancing Adverse Outcome Pathway (AOP) Development for Nanomaterial Risk Assessment and Categorisation Part 2: Case Study on Tissue Injury. *OECD Series on the Safety of Manufactured Nanomaterials No. 94*. OECD Publishing, Paris.  
[https://www.oecd.org/officialdocuments/publicdisplaydocumentpdf/?cote=env/jm/%20mono\(2020\)34&doclanguage=en](https://www.oecd.org/officialdocuments/publicdisplaydocumentpdf/?cote=env/jm/%20mono(2020)34&doclanguage=en)
- OECD (2020e). Advancing Adverse Outcome Pathway (AOP) Development for Nanomaterial Risk Assessment and Categorisation Part 3: Workshop Report and Recommendations. *OECD Series on the Safety of Manufactured Nanomaterials No. 95*. OECD Publishing, Paris.  
[https://www.oecd.org/officialdocuments/publicdisplaydocumentpdf/?cote=env/jm/%20mono\(2020\)35&doclanguage=en](https://www.oecd.org/officialdocuments/publicdisplaydocumentpdf/?cote=env/jm/%20mono(2020)35&doclanguage=en)
